# Supplementary figures and images for: A comprehensive assessment of the chemical composition, antioxidant, genoprotective and antigenotoxic activities of Lamiaceae species using different experimental models in vitro
Source: Royal Society of Chemistry journal article supplement (doi:10.1039/d1fo00447f), 2021-01-01

### Ethanol extracts

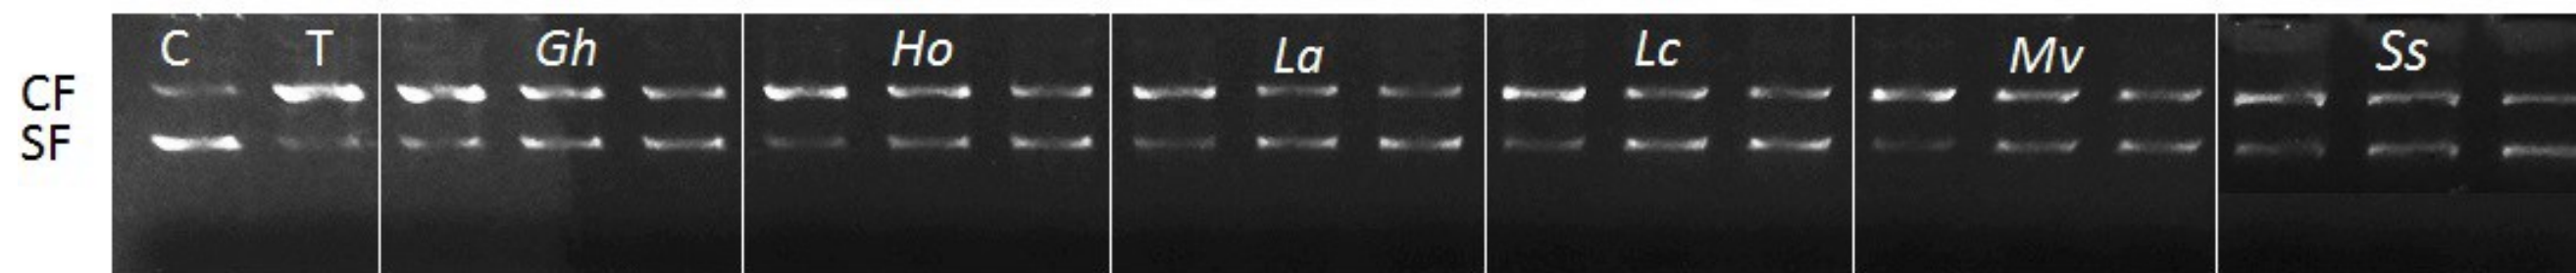

### Methanolic extracts

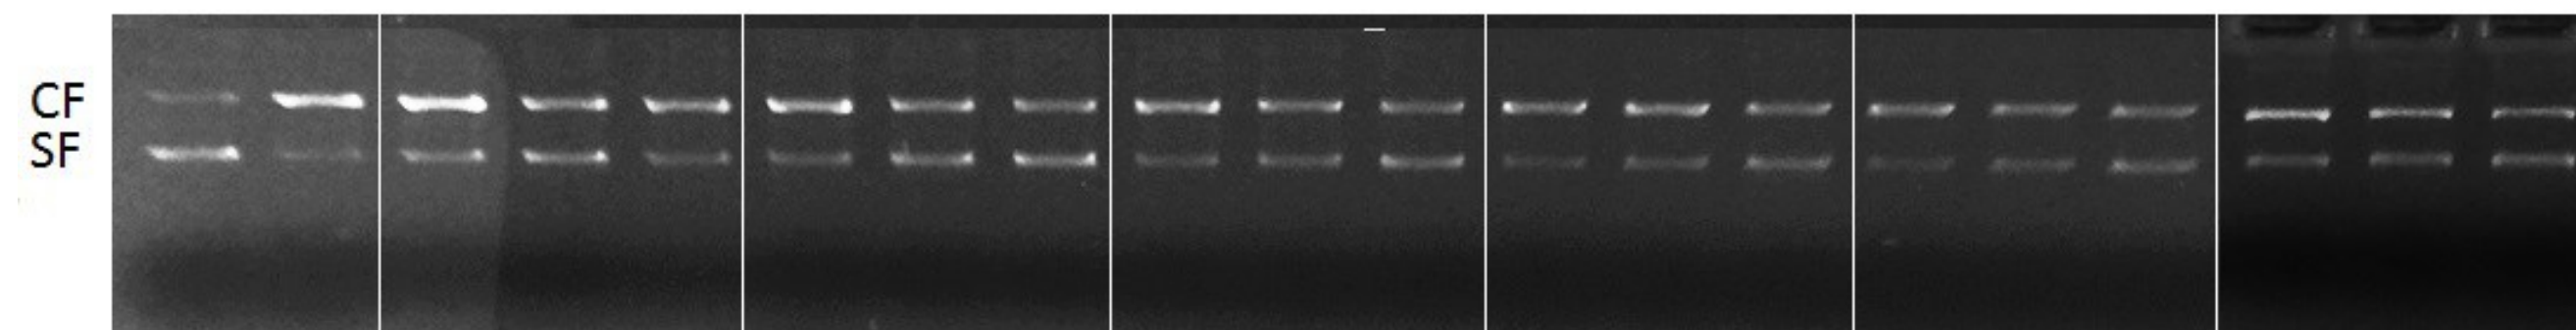

### Water extracts

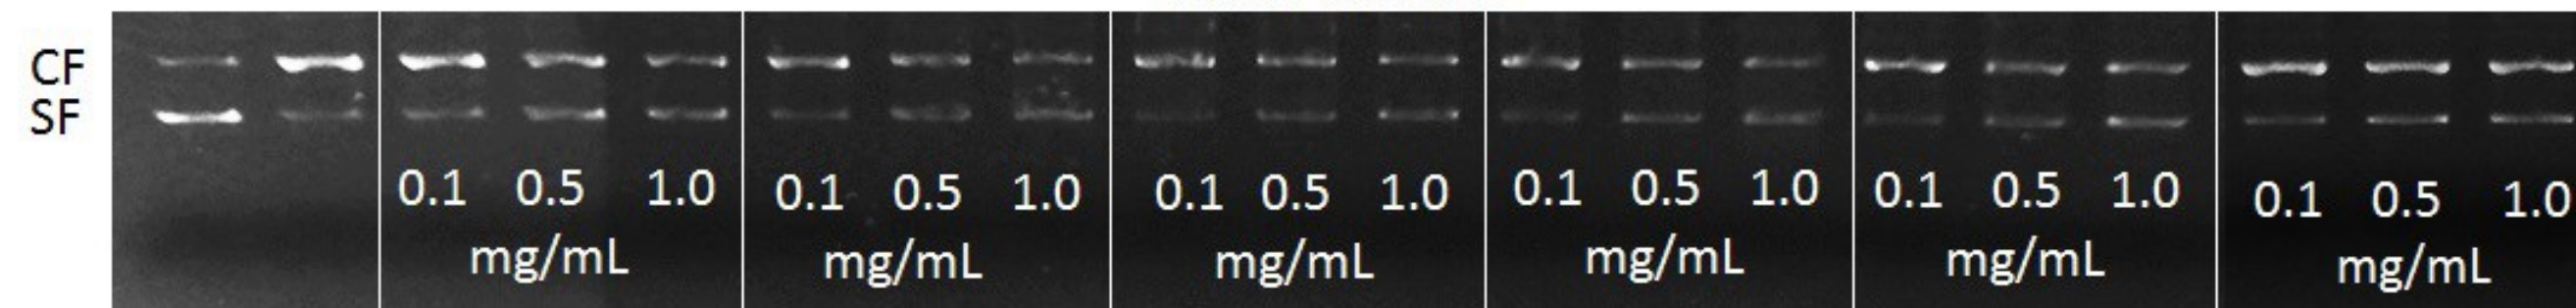

Supplement: d1fo00447f2.pdf [file d1fo00447f2.pdf]
